# Supplementary material for: Synthesis and properties of oligonucleotides modified with an N-methylguanidine-bridged nucleic acid (GuNA[Me]) bearing adenine, guanine, or 5-methylcytosine nucleobases
Source: publisher site journal article supplement (doi:10.3762/bjoc.17.54), 2021-03-04
Supplement: Additional file 1 [file 1860-5397-17-54-S1.pdf]

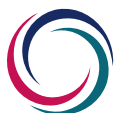

## Supporting Information

for

### **Synthesis and properties of oligonucleotides modified with an *N*-methylguanidine-bridged nucleic acid (GuNA[Me]) bearing adenine, guanine, or 5-methylcytosine nucleobases**

Naohiro Horie, Takao Yamaguchi, Shinji Kumagai and Satoshi Obika

*Beilstein J. Org. Chem.* **2021**, *17*, 622–629. [doi:10.3762/bjoc.17.54](https://doi.org/10.3762/bjoc.17.54)

**$^1\text{H}$ ,  $^{13}\text{C}$ , and  $^{32}\text{P}$  NMR spectra for all new compounds, HPLC charts and MALDI–TOF mass data for all new oligonucleotides, UV melting curves of the duplexes formed between GuNA[Me]-modified oligonucleotides and ssDNAs (or ssRNAs), and CD spectra of ON4/ssRNA and ON4/ssDNA**

## **Table of contents**

1.  $^1\text{H}$  NMR,  $^{13}\text{C}$  NMR, and  $^{31}\text{P}$  NMR spectra of new compounds
2. Characterisation of oligonucleotides
3. UV melting experiments
4. CD spectral analysis

1.  $^1\text{H}$  NMR,  $^{13}\text{C}$  NMR, and  $^{31}\text{P}$  NMR spectra of new compounds

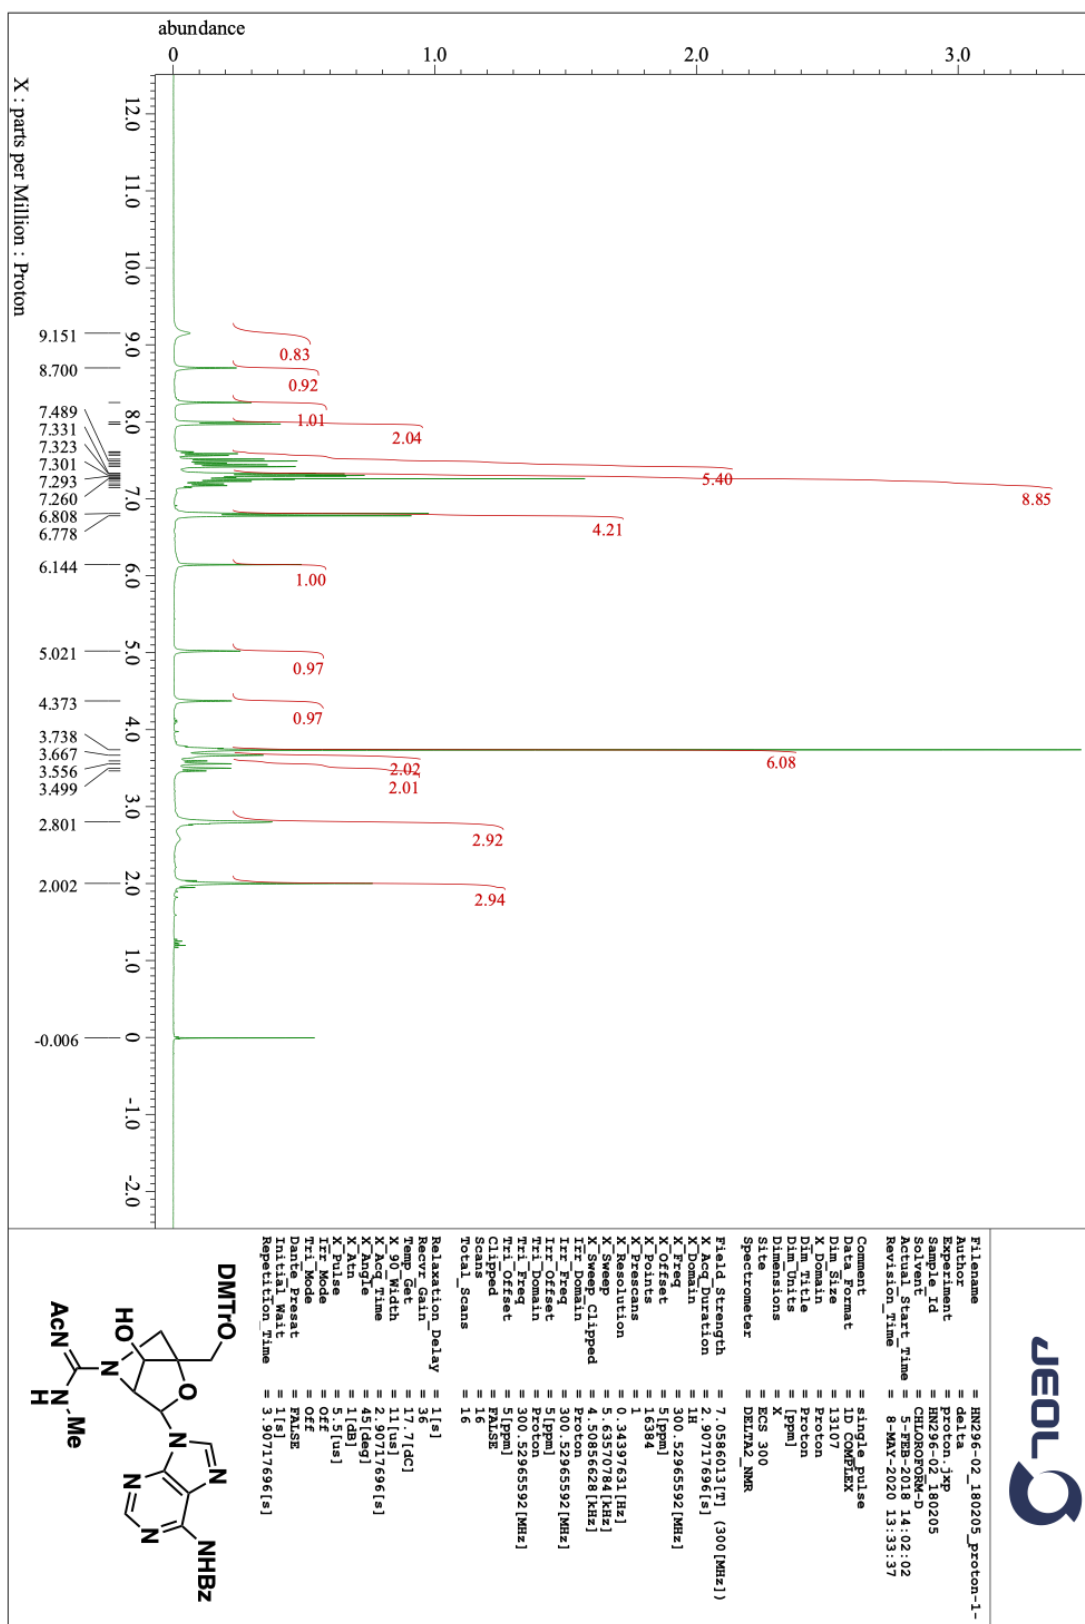

Figure S1: Compound 2a ( $^1\text{H}$  NMR,  $\text{CDCl}_3$ , 300 MHz)

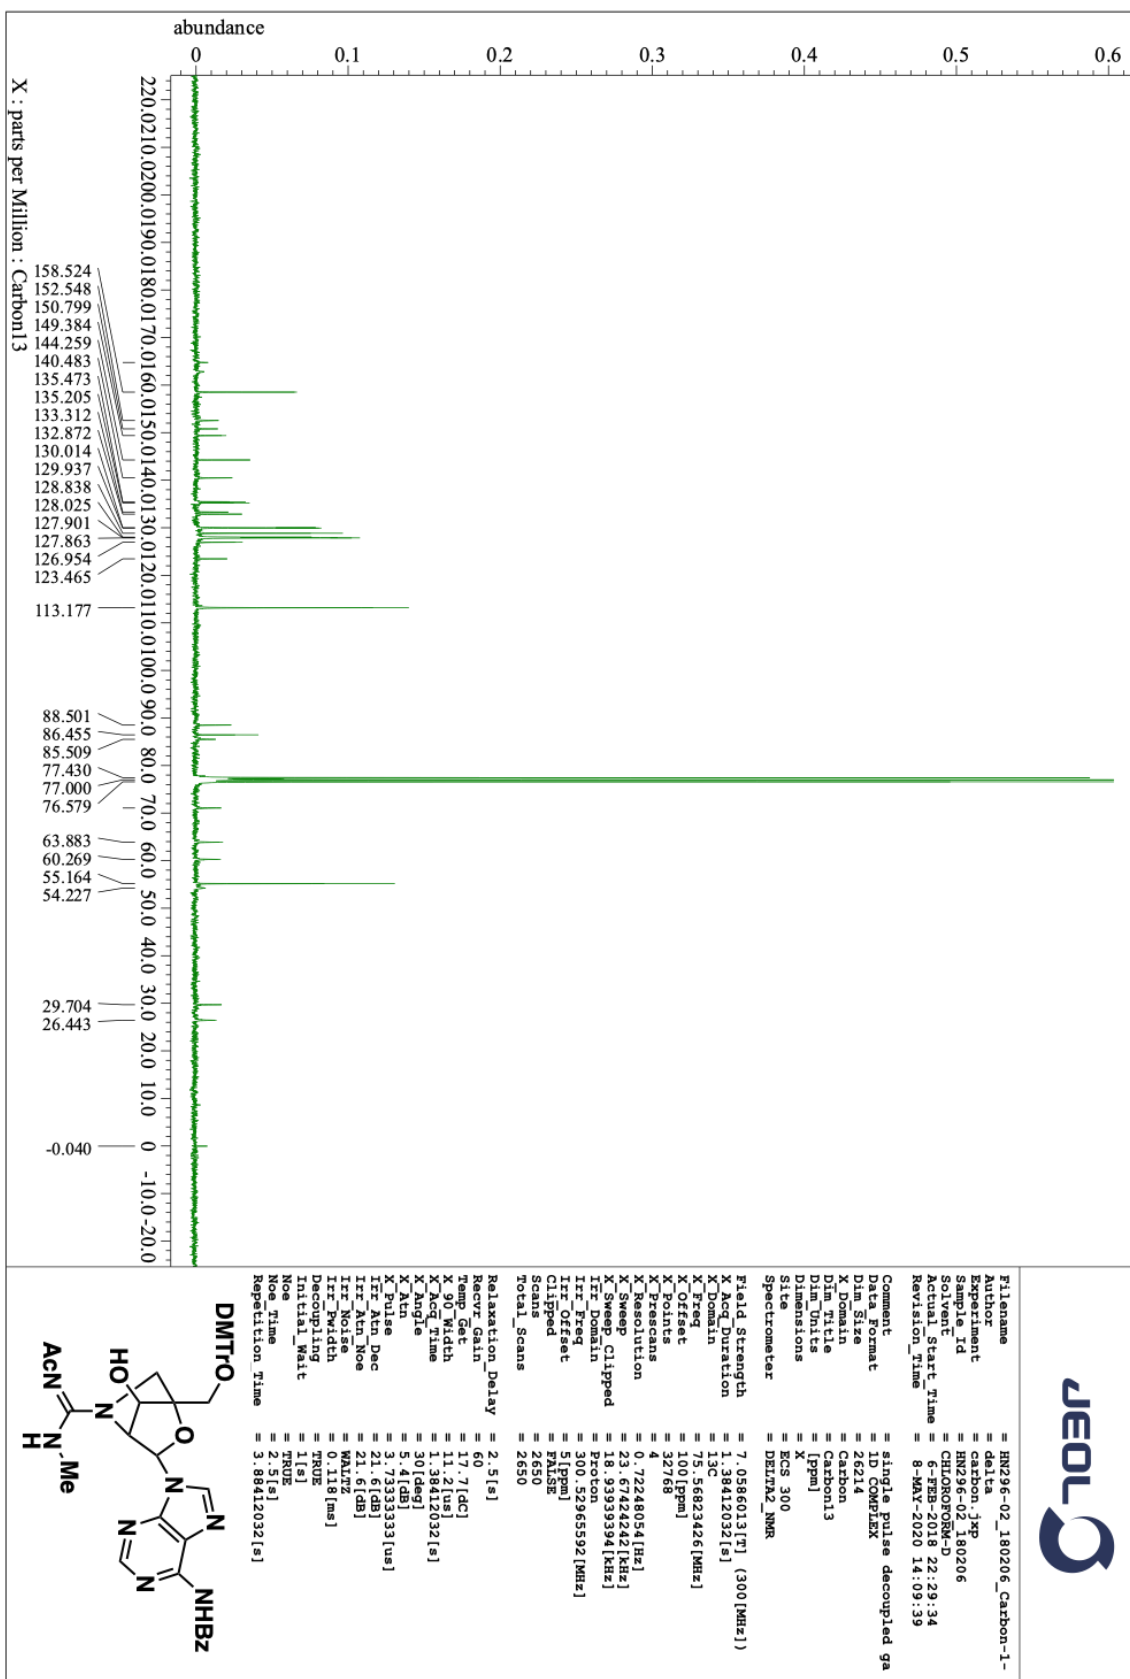

Figure S2: Compound 2a ( $^{13}\text{C}$  NMR,  $\text{CDCl}_3$ , 76 MHz)

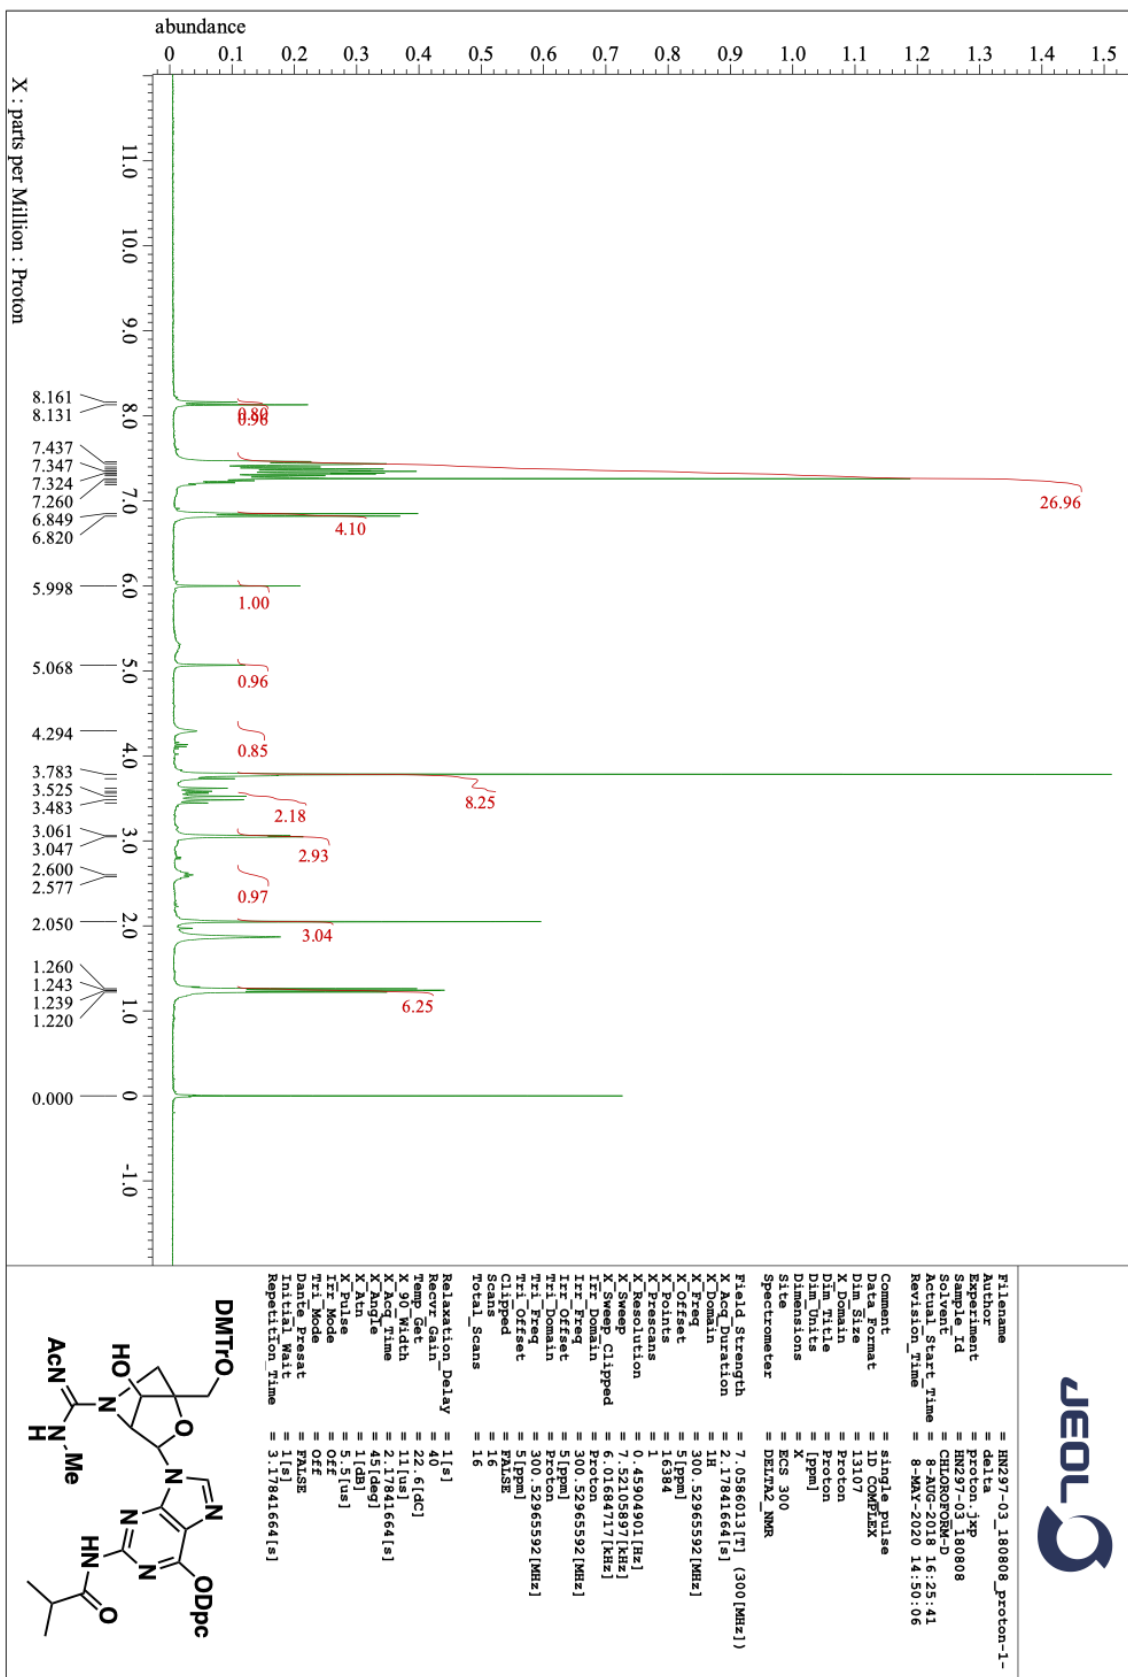

Figure S3: Compound 2b ( $^1\text{H}$  NMR,  $\text{CDCl}_3$ , 300 MHz)

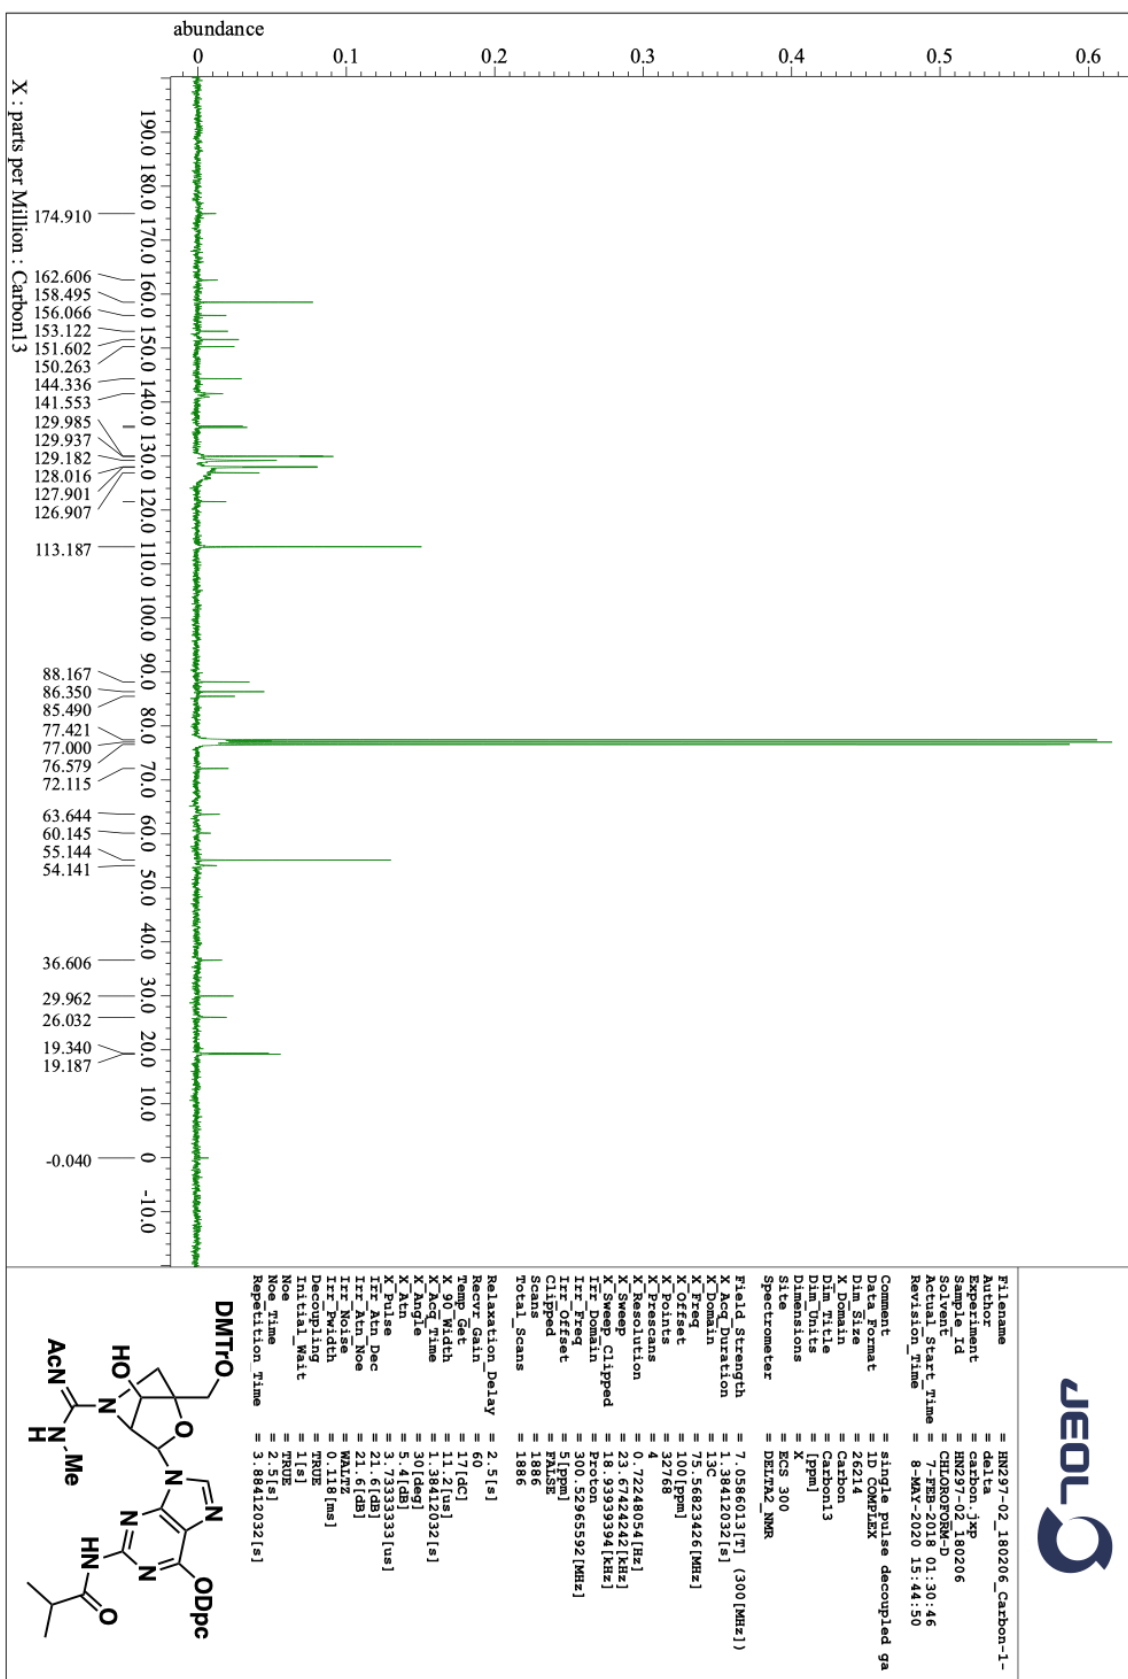

Figure S4: Compound **2b** ( $^{13}\text{C}$  NMR,  $\text{CDCl}_3$ , 76 MHz)

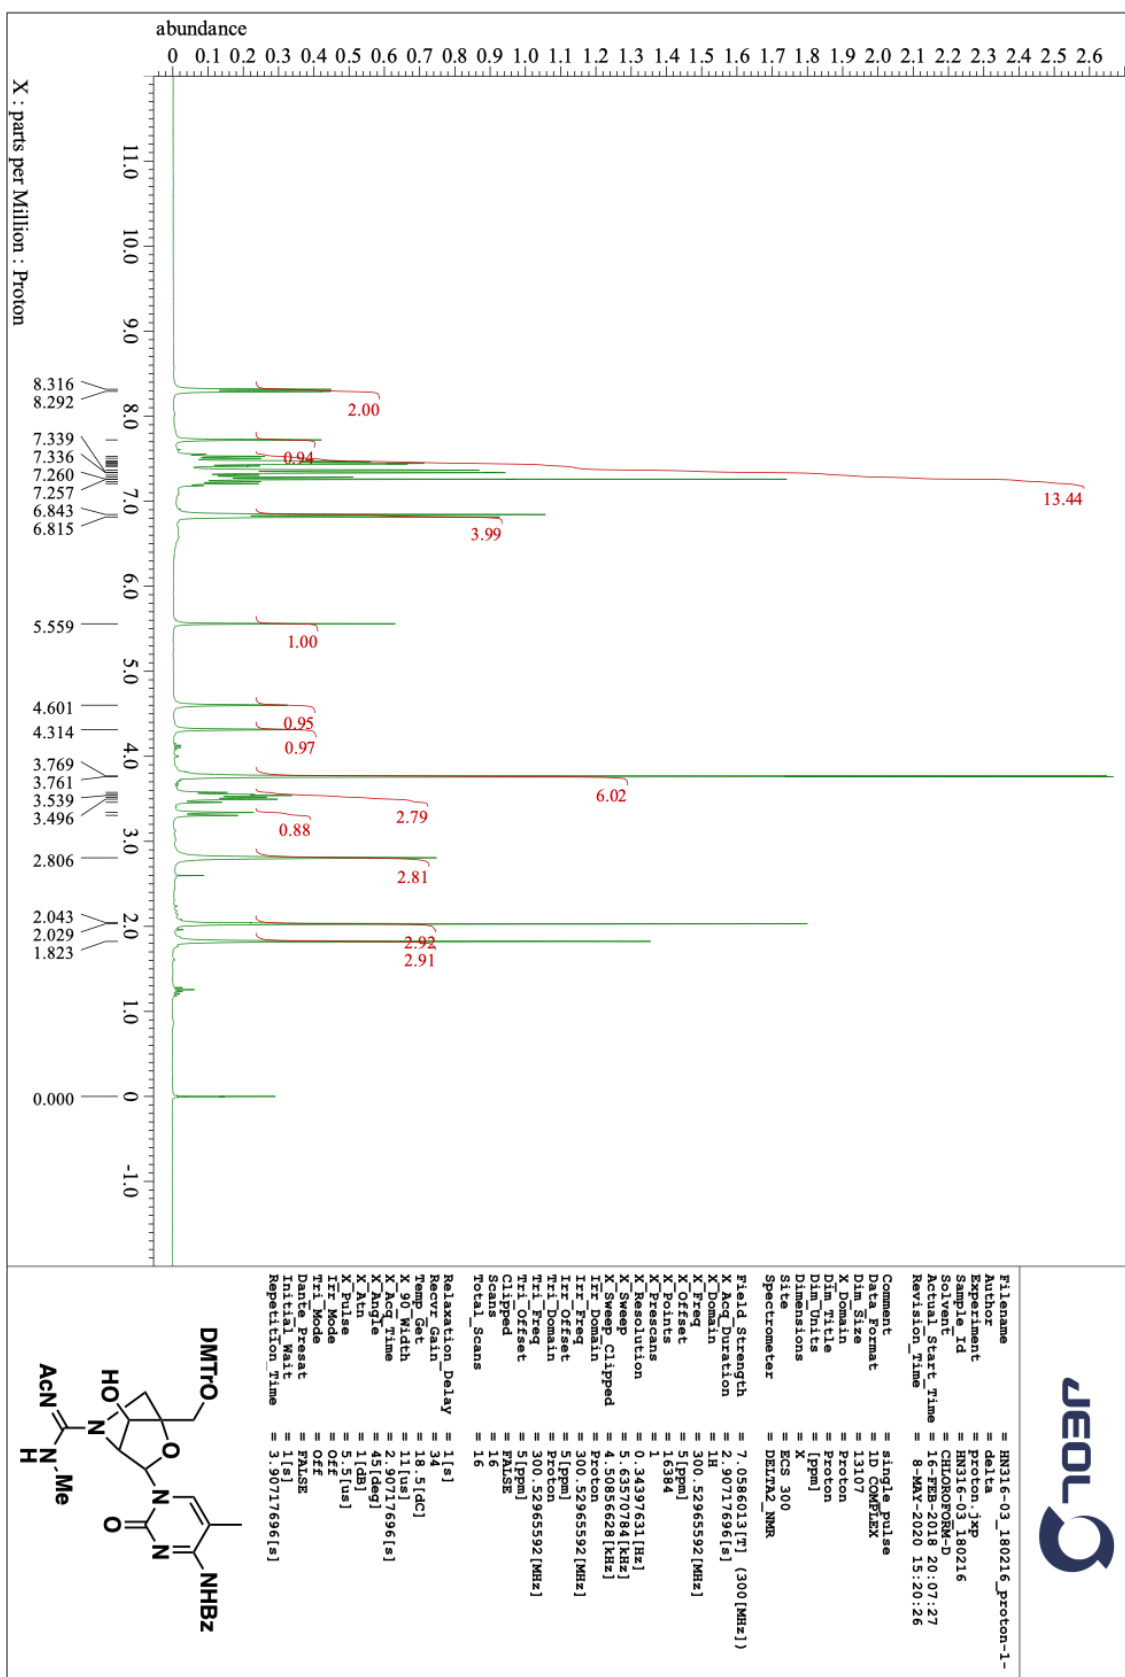

Figure S5: Compound 2c ( $^1\text{H}$  NMR,  $\text{CDCl}_3$ , 300 MHz)

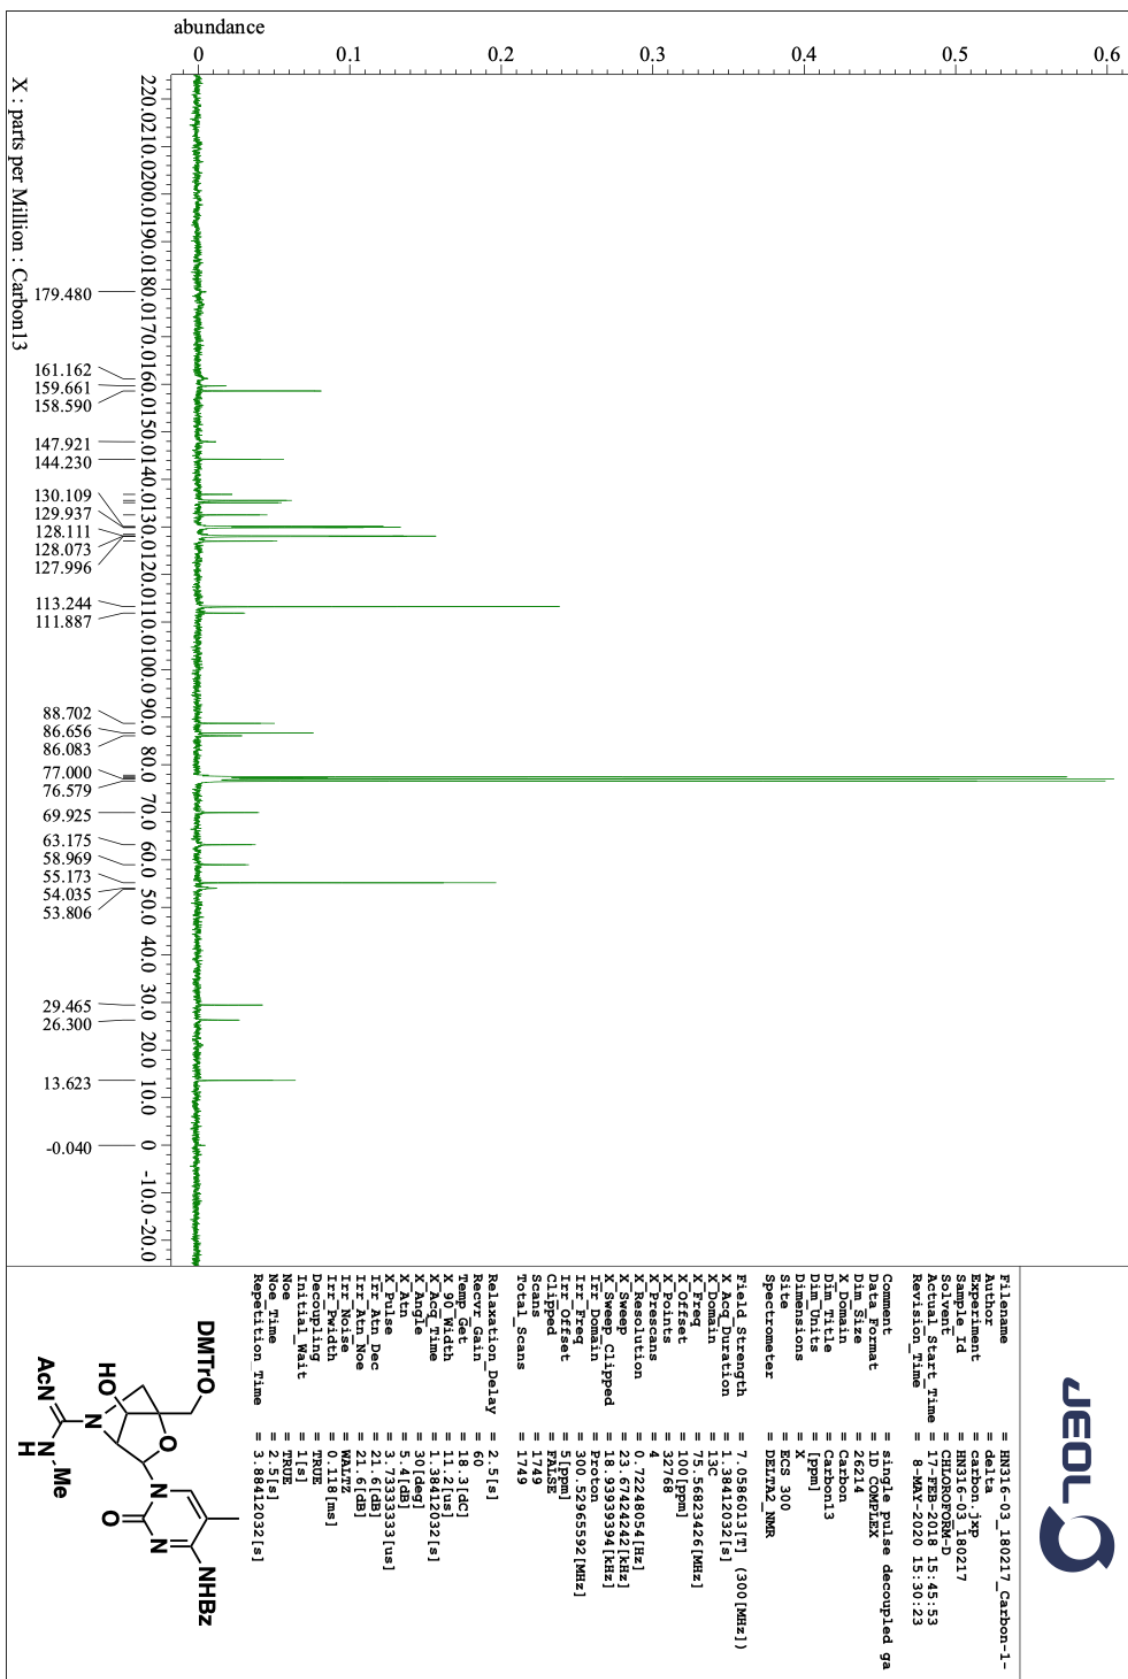

Figure S6: Compound **2c** ( $^{13}\text{C}$  NMR,  $\text{CDCl}_3$ , 76 MHz)



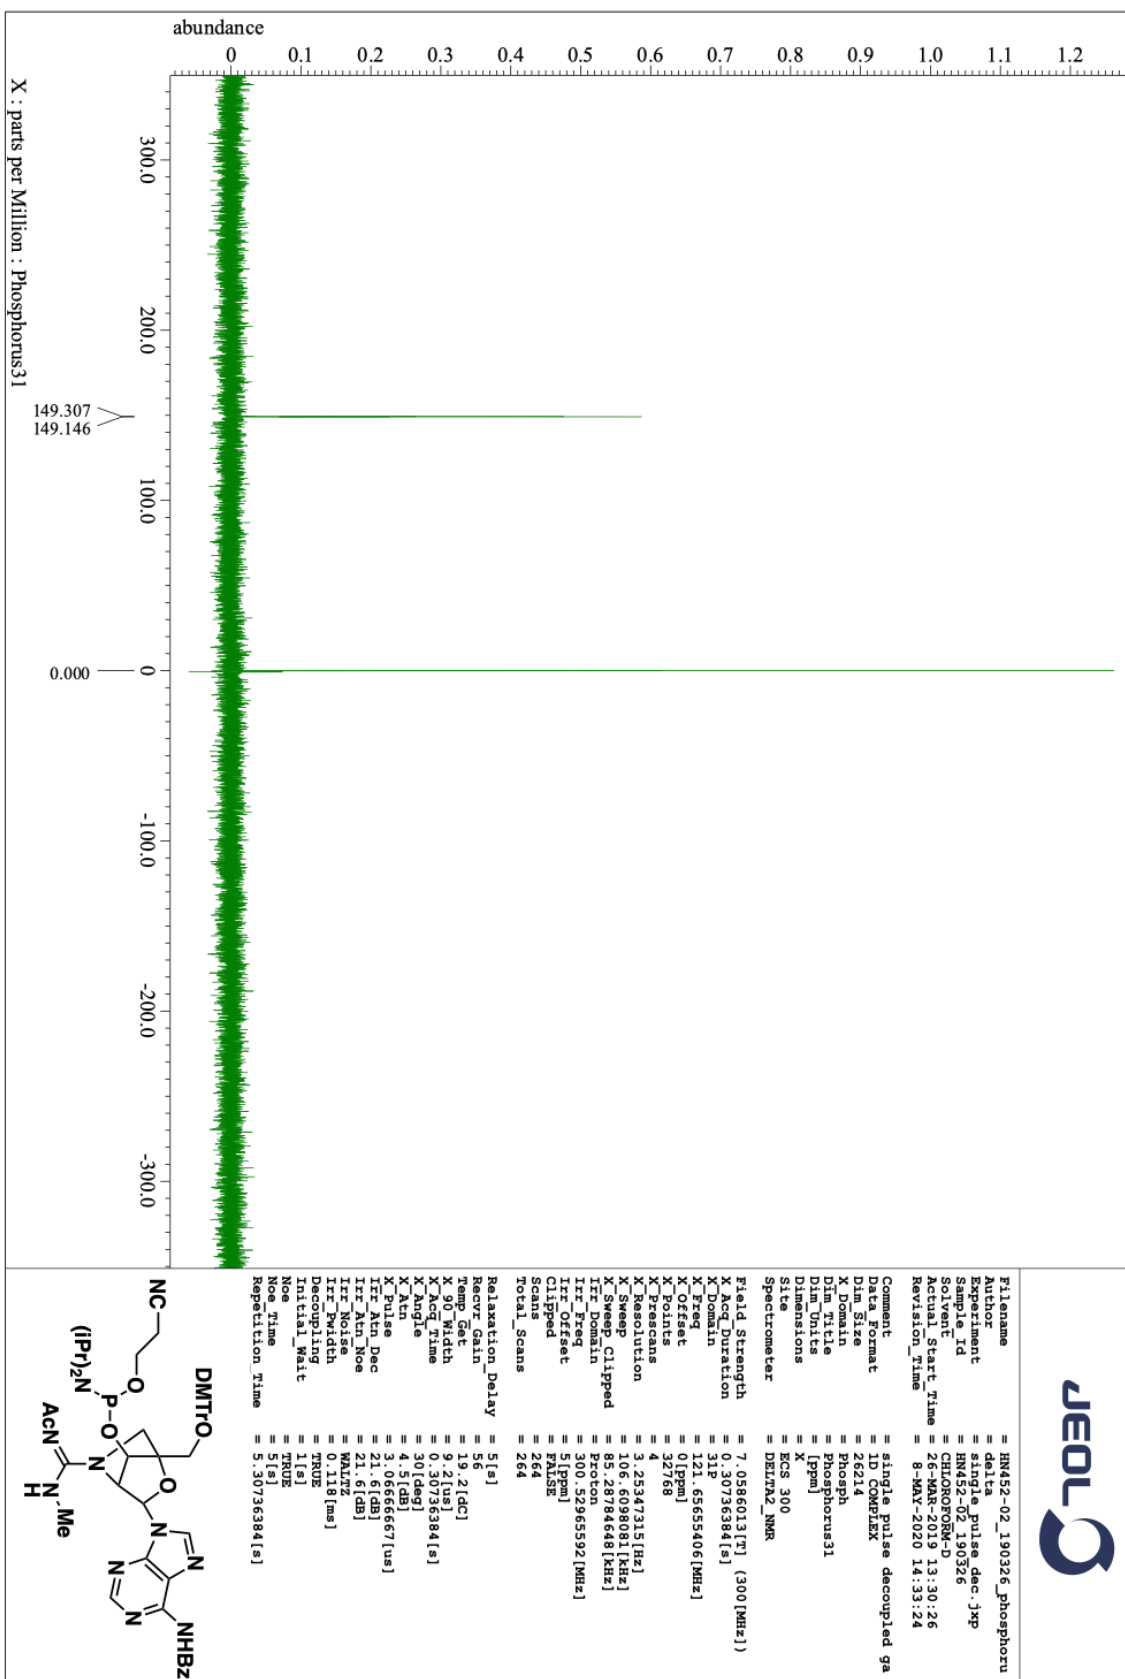

Figure S7: Compound 3a (<sup>31</sup>P NMR, CDCl<sub>3</sub>, 122 MHz)

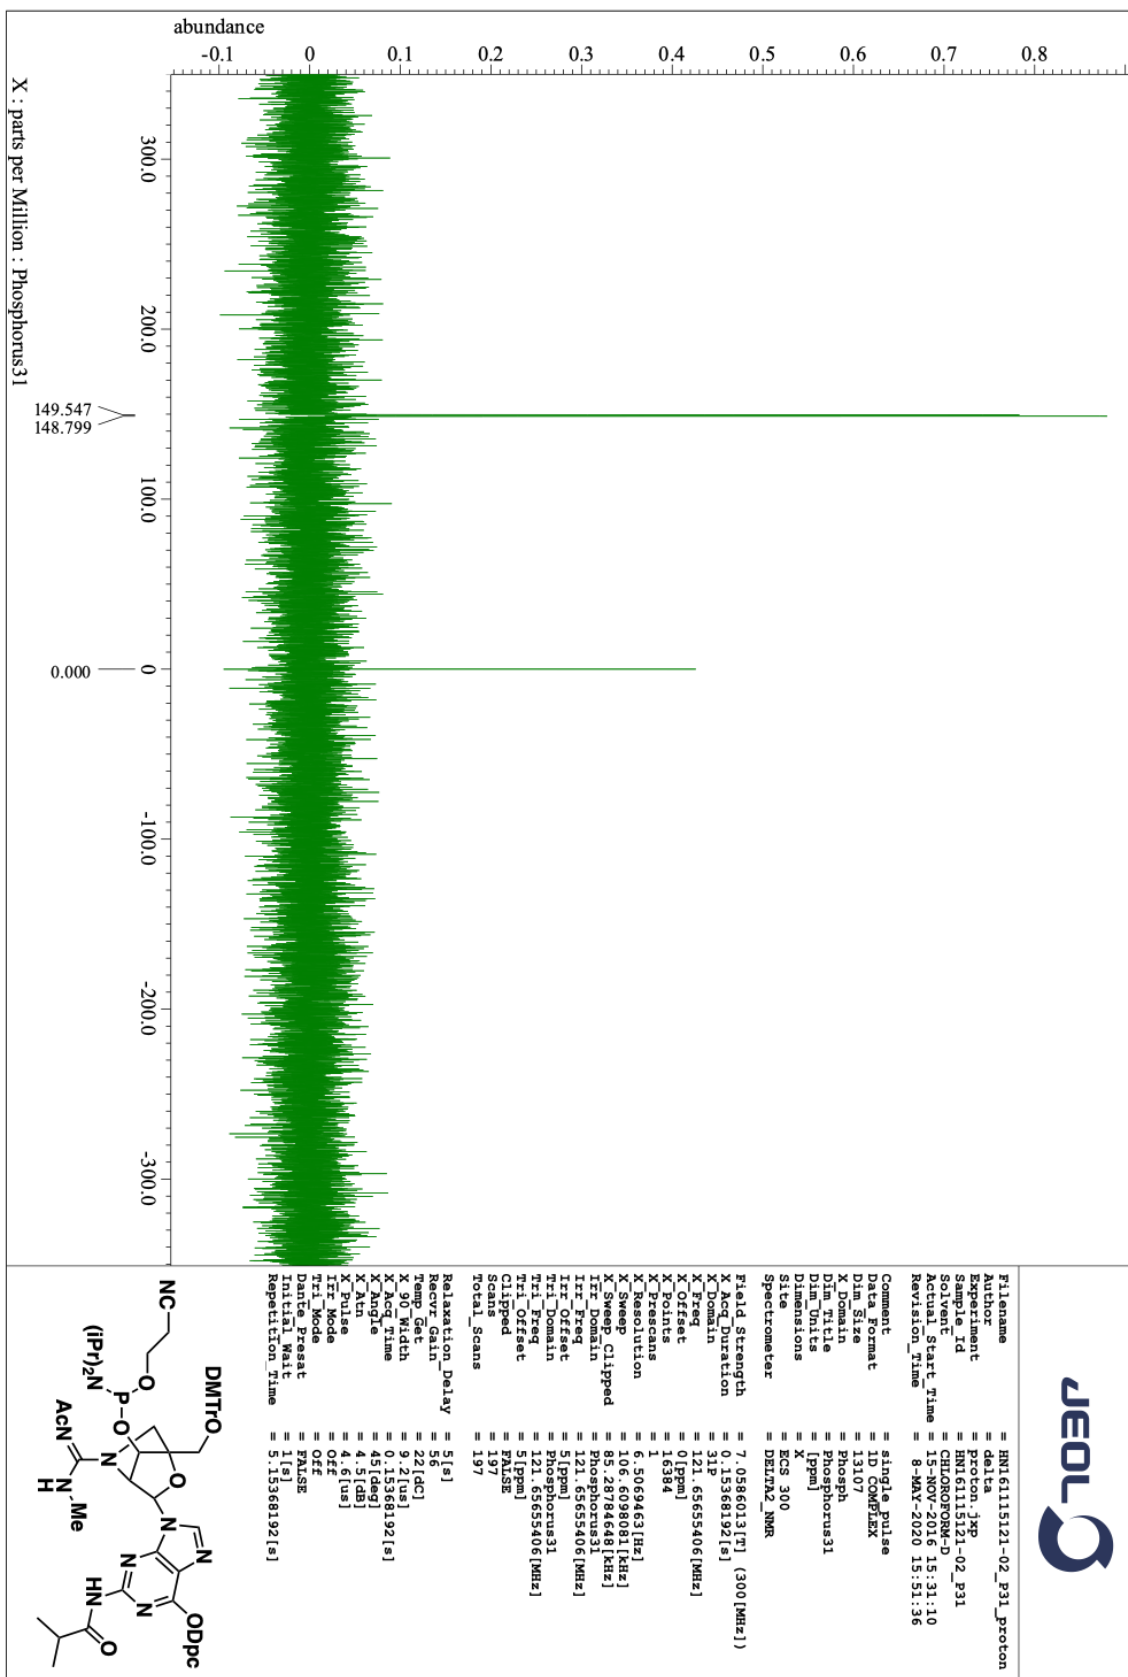

Figure S8: Compound **3b** ( $^{31}\text{P}$  NMR,  $\text{CDCl}_3$ , 122 MHz)

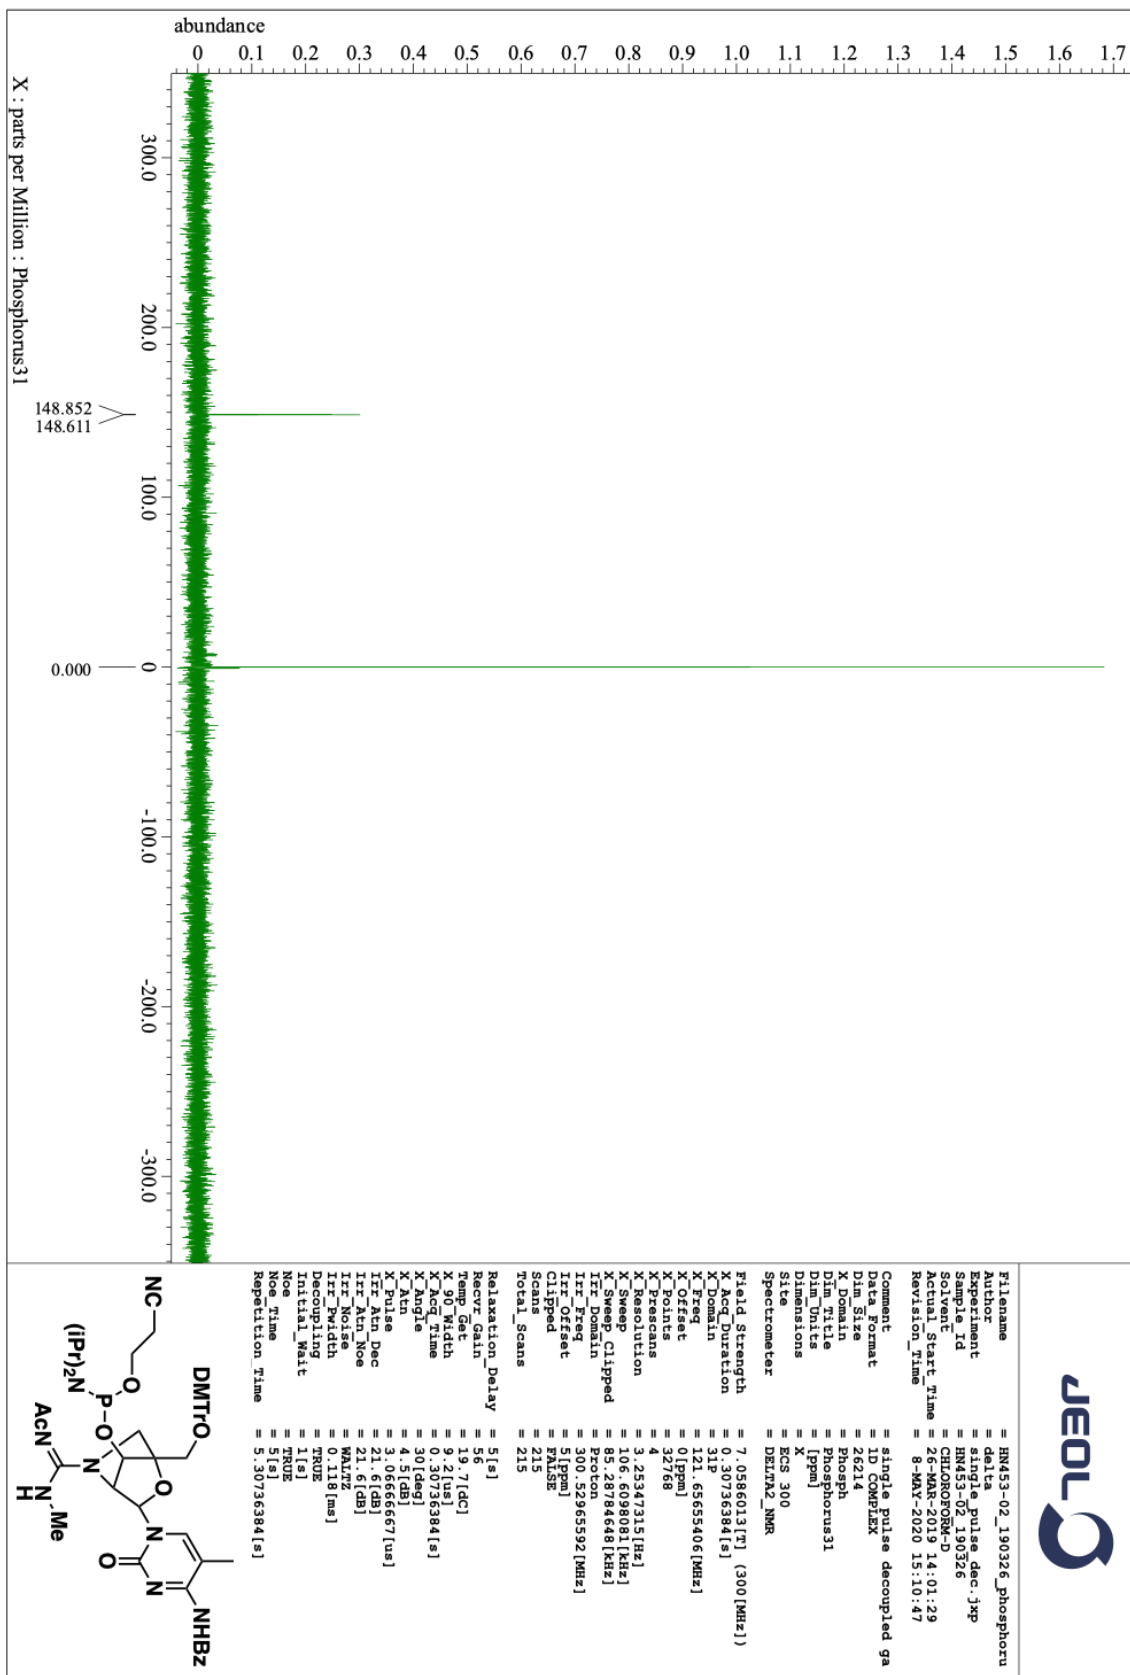

Figure S9: Compound 3c (<sup>31</sup>P NMR, CDCl<sub>3</sub>, 122 MHz)

## 2. Characterisation of oligonucleotides

ON1 5'-d(GCG TTA TTT GCT)-3'

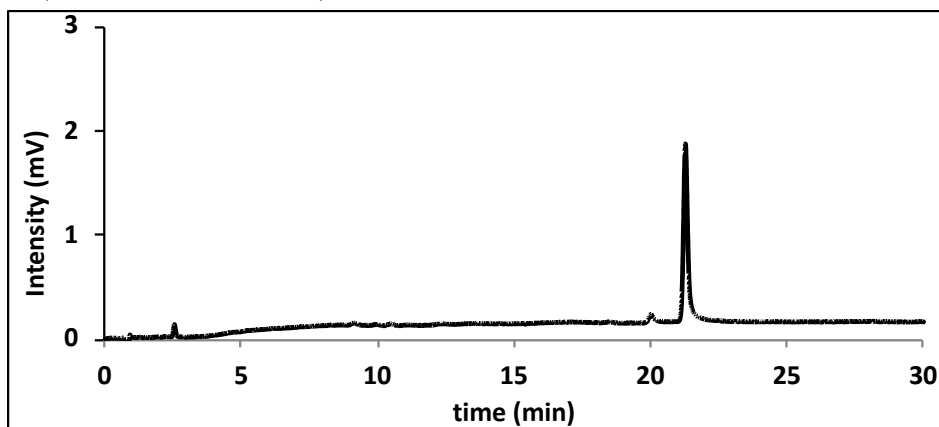

ON2 5'-d(GCG TTG TTT GCT)-3'

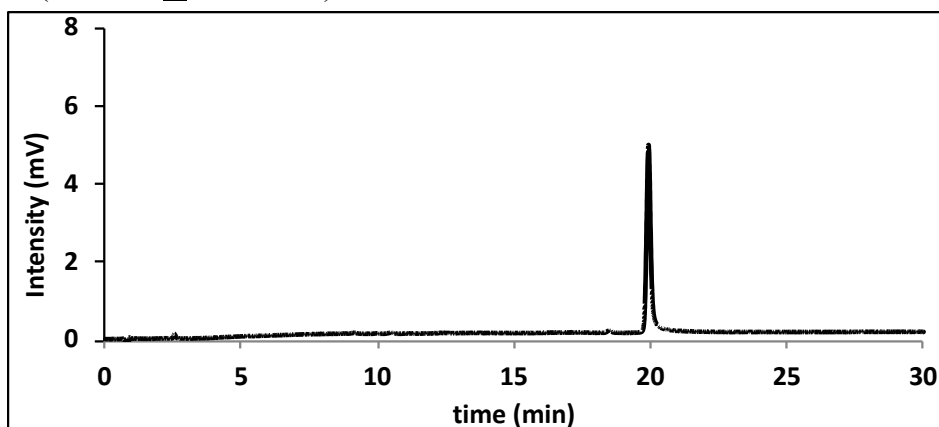

ON3 5'-d(GCG TT<sup>m</sup>C TTT GCT)-3'

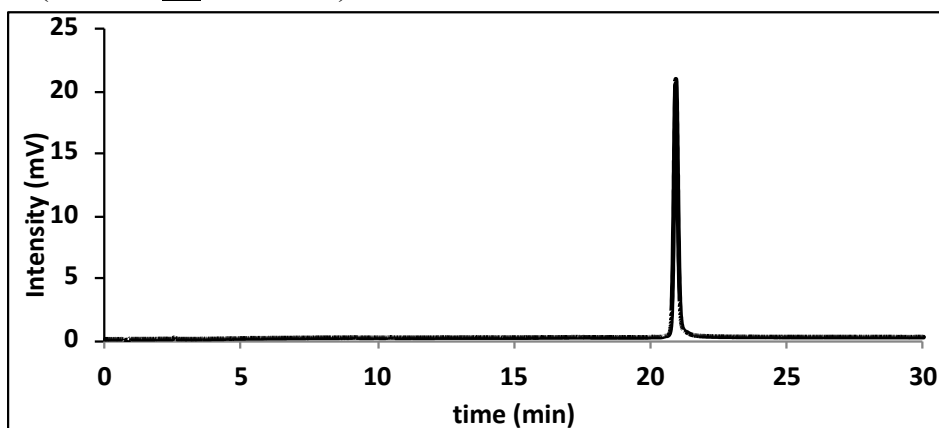

**Figure S10:** HPLC charts of all new oligonucleotides. HPLC conditions: Reversed-phase HPLC (Waters XBridge™ C18 column) with a linear gradient of acetonitrile (5 to 10% over 5 min, then 10 to 15% over 20 min, then 15 to 15%, over 5 min) in 0.1 M triethylammonium acetate buffer (pH 7.0). A, G, and <sup>m</sup>C indicate GuNA[Me] modifications.

ON1 5'-d(GCG TTA TTT GCT)-3' (A)

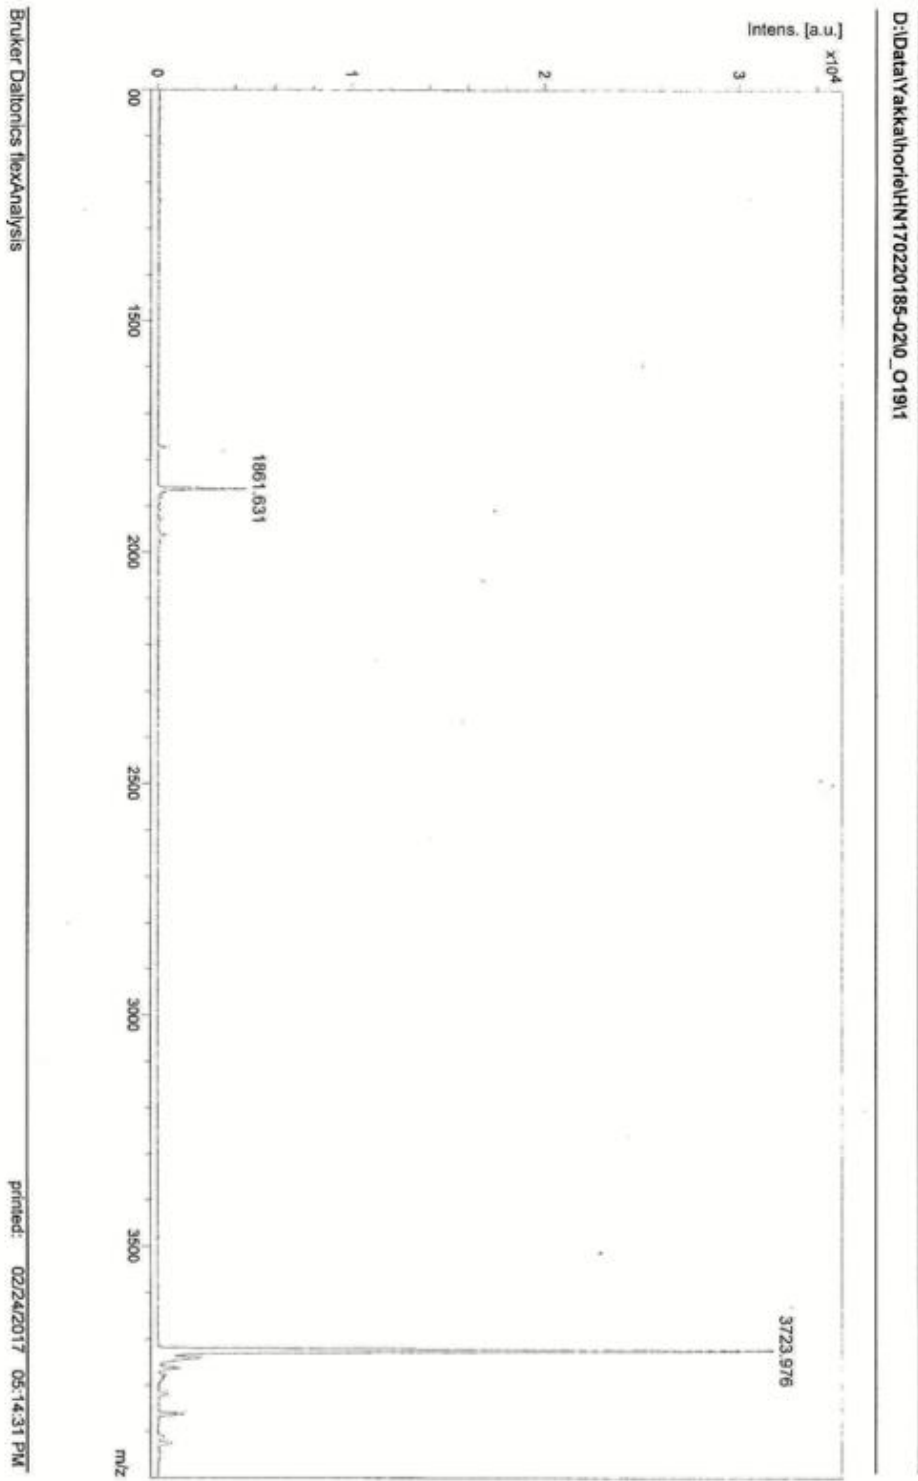

ON2 5'-(GCG TTG TTT GCT)-3' (B)

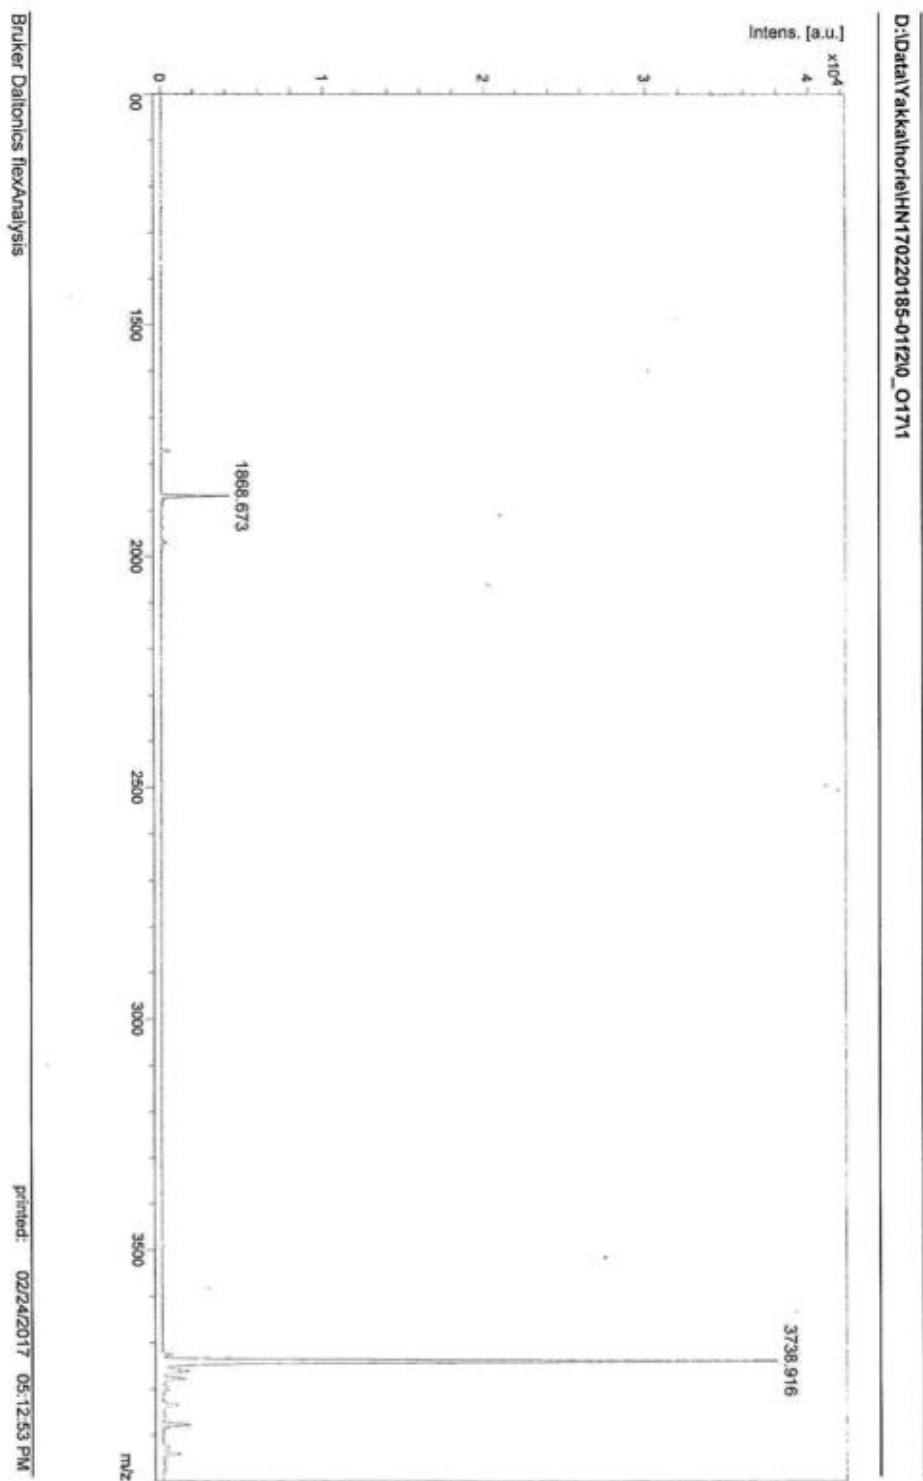

ON3 5'-d(GCG TT<sup>m</sup>C TTT GCT)-3' (C)

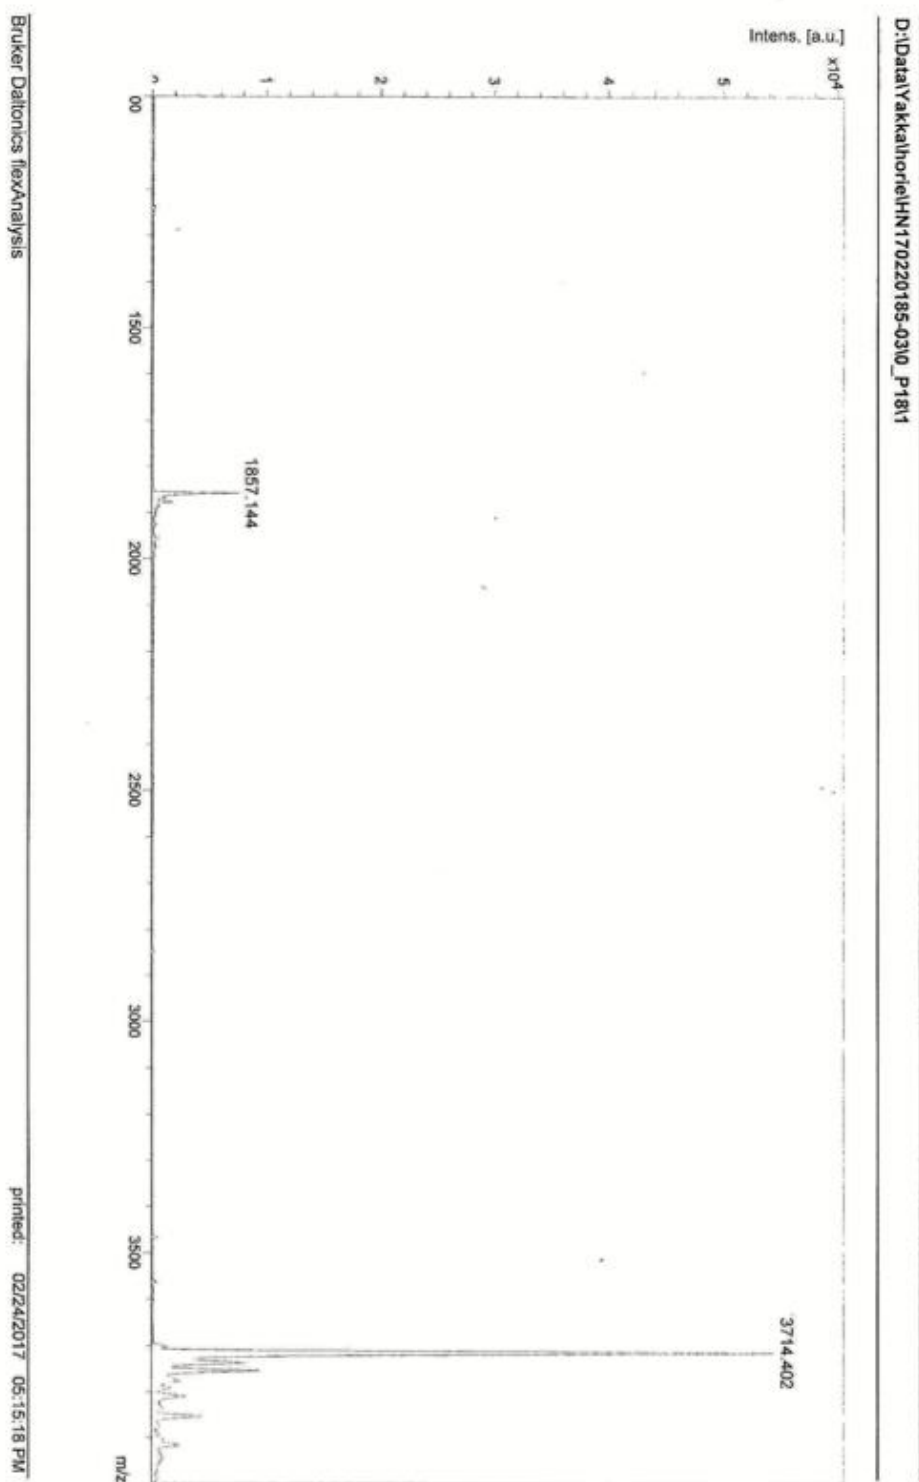

**Figure S11:** MALDI-TOF-MS charts of all new oligonucleotides. **ON1** 5'-d(GCG TTA TTT GCT)-3' (A), **ON2** 5'-(GCG TT<sub>G</sub> TTT GCT)-3' (B), **ON3** 5'-d(GCG TT<sup>m</sup>C TTT GCT)-3' (C); A, G, and <sup>m</sup>C indicate GuNA[Me] modifications.

### 3. UV melting experiments

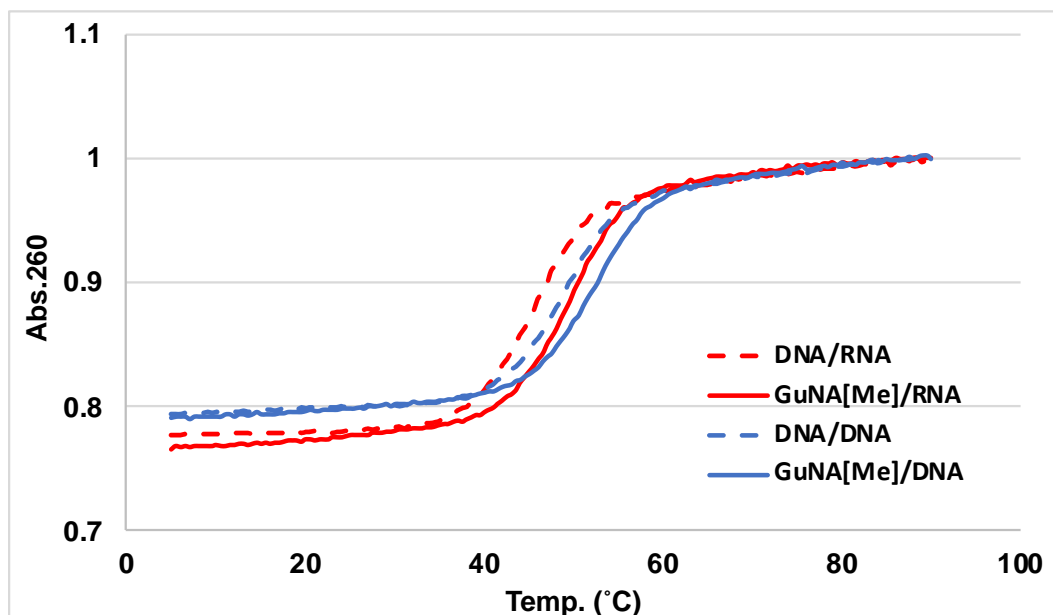

**Figure S12:** Normalized UV melting curves for the duplexes formed between **ON1/ON6** and the complementally DNA or RNA strands. The sequences are 5'-d(GCG TTA TTT GCT)-3' and 5'-r/d(AGC AAA YAA CGC)-3', respectively.

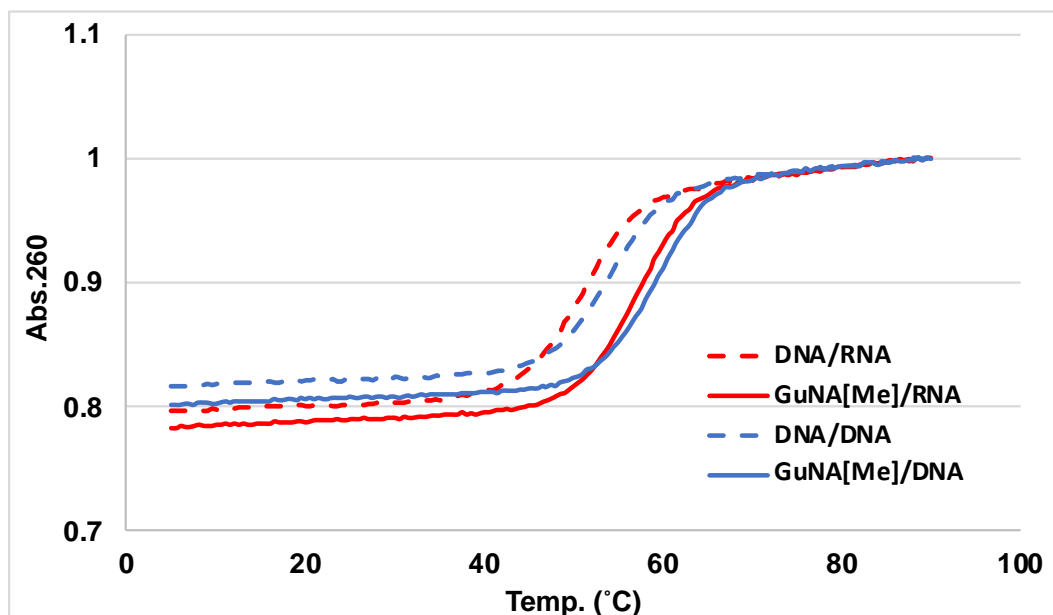

**Figure S13:** Normalized UV melting curves for the duplexes formed between **ON2/ON7** and the complementally DNA or RNA strands. The sequences are 5'-d(GCG TTG TTT GCT)-3' and 5'-r/d(AGC AAA CAA CGC)-3', respectively. Y indicates U for RNA, and T for DNA.



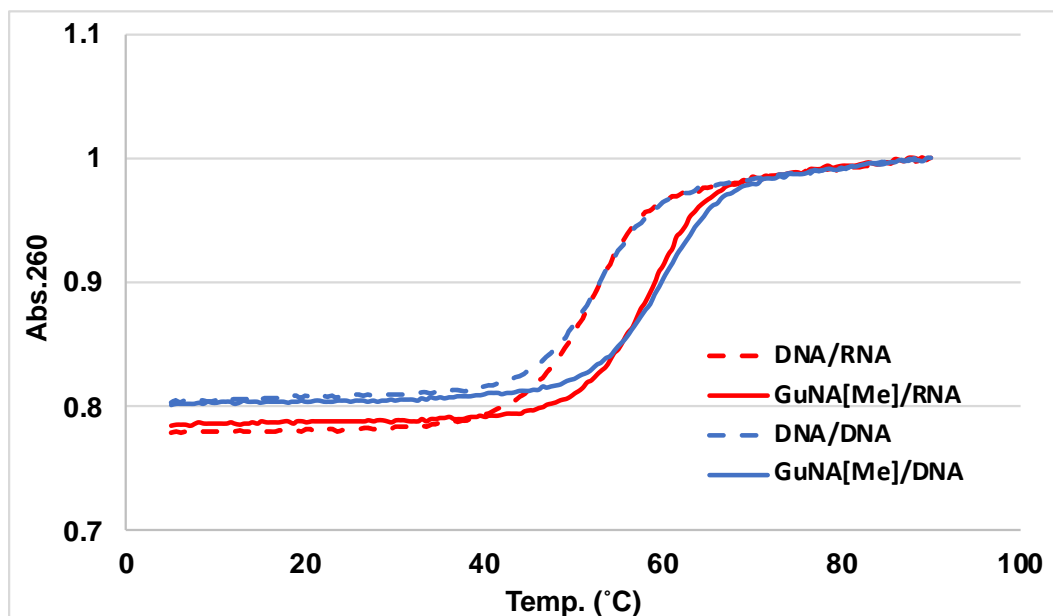

**Figure S14:** Normalized UV melting curves for the duplexes formed between **ON3/ON8** and the complementally DNA or RNA strands. The sequences are 5'-d(GCG TT<sup>m</sup>CTTT GCT)-3' and 5'-r/d(AGC AAA GAA CGC)-3', respectively.

#### 4. CD spectral analysis

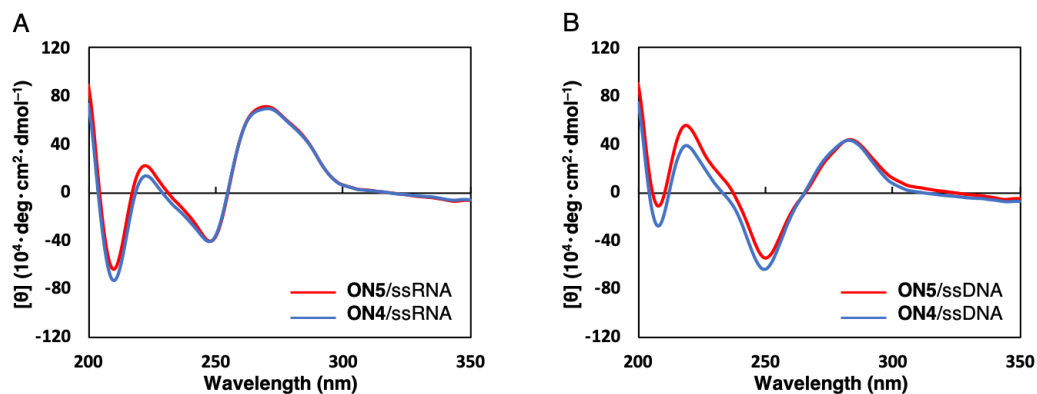

**Figure S15:** CD spectra of the **ON5/ssRNA**, **ON4/ssRNA**, **ON5/ssDNA** and **ON4/ssDNA** duplexes. Conditions: 10 mM sodium phosphate buffer (pH 7.2), 100 mM NaCl, 4  $\mu\text{M}$  each oligonucleotide. Sequences of the complementary ssRNA and ssDNA are 5'-r(AGC AAA AAA CGC)-3' and 5'-d(AGC AAA AAA CGC)-3', respectively.
